# Supplementary material for: Synthesis of the ABC tricyclic fragment of the pectenotoxins via stereocontrolled cyclization of a γ-hydroxyepoxide appended to the AB spiroacetal unit
Source: Royal Society of Chemistry journal article supplement (doi:10.1039/b600951d), 2006-01-01
Supplement: b600951d.pdf [file b600951d.pdf]

## **ELECTRONIC SUPPLEMENTARY MATERIAL**

### **Synthesis of the ABC tricyclic fragment of the pectenotoxins via stereocontrolled cyclization of a $\gamma$ -hydroxyepoxide appended to the AB spiroacetal unit.**

Rosliana Halim, Margaret A. Brimble\* and Jörn Merten

*Department of Chemistry, University of Auckland, 23 Symonds St., Auckland, New Zealand.*

FAX: +64 9 3737422; EMAIL: m.brimble@auckland.ac.nz

## **Experimental**

### **General**

All reactions were carried out under an N<sub>2</sub> atmosphere using oven-dried glassware using standard syringe and septum techniques, unless otherwise stated. Diethyl ether and tetrahydrofuran were distilled from Na/benzophenone under N<sub>2</sub>. Hexane, CH<sub>2</sub>Cl<sub>2</sub>, and NEt<sub>3</sub> were distilled from CaH<sub>2</sub> under N<sub>2</sub>. Butyllithium (1.6 M in hexane) was purchased from the Aldrich Chemical Co. Flash chromatography was performed using Riedel-de H  en or Merck 0.032-0.063mm silica gel and preparative layer chromatography with Merck silica gel 60 PF on glass plates, with the indicated solvents. Analytical TLC was performed with 0.20mm silica gel 60 aluminium-backed plates and analyzed using 365 nm ultraviolet irradiation followed by staining with either alkaline permanganate or vanillin solution. High resolution mass spectra were obtained using EI, CI and FAB techniques on a VG70-SE spectrometer. NMR spectra were recorded on either a Bruker DRX300 spectrometer operating at 300 MHz for <sup>1</sup>H nuclei and 75 MHz for <sup>13</sup>C nuclei or on a Bruker DRX400 spectrophotometer operating at 400 MHz for <sup>1</sup>H nuclei and 100 MHz for <sup>13</sup>C nuclei. Melting points were determined on a Kofler hot-stage apparatus and are uncorrected. Optical rotations were determined on a Perkin-Elmer 341 polarimeter.

**(2'R, 3'S, 4R, 5S)-(+)-3-(7'-Benzyloxy-3'-hydroxy-2'-methylheptanoyl)-4-methyl-5-phenyloxazolidin-2-one (*syn*-adduct 17)**

To a solution of (4*R*, 5*S*)-(+)-4-methyl-3-(1'-oxopropyl)-5-phenyloxazolidin-2-one<sup>i</sup> (1.22 g, 5.2 mmol) in dry CH<sub>2</sub>Cl<sub>2</sub> (40 mL) at 0 °C under N<sub>2</sub> was slowly added TiCl<sub>4</sub> (5.0 mL, 1 M solution in CH<sub>2</sub>Cl<sub>2</sub>, 5 mmol). The orange mixture was stirred at 0 °C for 5 min followed by the addition of (-)-sparteine (1.20 mL, 5.2 mmol) to form a dark red enolate. The mixture was stirred at 0 °C for 20 min then cooled to -78 °C. *N*-Methyl-2-pyrrolidone (0.50, 5.2 mmol) was added and the mixture was stirred for 10 min followed by the addition of 5-benzyloxypentanal<sup>ii</sup> (1.18 g, 6.1 mmol) in dry CH<sub>2</sub>Cl<sub>2</sub> (25 mL). The mixture was stirred at -78°C for 1 h, warmed to 0°C then stirred for 1 hr. During this time, the colour of the mixture changed from dark red to light brown. The reaction was quenched with 50% aqueous NH<sub>4</sub>Cl (15 mL) and warmed to room temperature. The layers were separated and the aqueous layer was extracted with CH<sub>2</sub>Cl<sub>2</sub> (3 × 30 mL). The organic layers were combined, washed with brine (2 × 30 mL) and dried over Na<sub>2</sub>SO<sub>4</sub>. The solvent was evaporated to give a residual pale yellow oil. The crude product was purified by flash chromatography using hexane-ethyl acetate (4:1) to afford the *title compound* **17** (1.92 g, 90%) as a colourless oil; [α]<sub>D</sub> +7.7° (c=1.02, CH<sub>2</sub>Cl<sub>2</sub>); Found: MH<sup>+</sup>, 426.2261, C<sub>25</sub>H<sub>32</sub>NO<sub>5</sub> requires 426.2281; ν<sub>max</sub> (film)/cm<sup>-1</sup> 3518 (OH), 1780s (OC=O), 1698m (NC=O), 1364m; δ<sub>H</sub> (300 MHz, CDCl<sub>3</sub>) 0.87 (3H, d, *J* 6.6 Hz, 4-Me), 1.23 (3H, d, *J* 6.9 Hz, 2'-Me), 1.44-1.67 (6H, m, H-4', H-5', H-6'), 3.0 (1H, br, OH), 3.48 (2H, t, *J* 6.3 Hz, H-7'), 3.78 (1H, dq, *J* 3.0, 6.9 Hz, H-2'), 3.95 (1H, m, H-3'), 4.49 (2H, s, CH<sub>2</sub>Ph), 4.76 (1H, pentet, *J* 6.6 Hz, H-4), 5.64 (1H, d, *J* 7.3 Hz, H-5), 7.26-7.40 (10H, m, 2 × Ph); δ<sub>C</sub> (75 MHz, CDCl<sub>3</sub>) 10.2 (CH<sub>3</sub>, Me), 14.2 (CH<sub>3</sub>, Me), 20.8 (CH<sub>2</sub>, C-5'), 29.4 (CH<sub>2</sub>, C-4'), 33.6 (CH<sub>2</sub>, C-6'), 42.2 (CH, C-2'), 54.6 (CH, C-4), 70.1 (CH<sub>2</sub>, C-7'), 71.4 (CH, C-3'), 72.7 (CH<sub>2</sub>, CH<sub>2</sub>Ph), 78.7 (CH, C-5), 125.5 (CH, Ph), 127.3 (CH, *p*-Ph), 127.4 (CH, Ph), 128.2 (CH, Ph), 128.5 (CH, Ph), 128.6 (CH, *p*-Ph), 133.0 (C, Ph), 138.5 (C, Ph), 152.5 (C, C-2), 176.9 (C, C-1'); *m/z* 426 (MH<sup>+</sup>, 0.05%), 319 (MH-OCH<sub>2</sub>Ph, 0.5%), 107 (OCH<sub>2</sub>Ph, 56%), 91 (CH<sub>2</sub>Ph, 100%).

**(2'R, 3'S, 4R, 5S)-(+)-3-(7'-Benzyloxy-3'-hydroxy-2'-methylheptanoyl)-4-methyl-5-phenyloxazolidin-2-thione (Evans *syn*-adduct 18), (2'S, 3'R, 4R, 5S)-(+)-3-(7'-Benzyloxy-3'-hydroxy-2'-methylheptanoyl)-4-methyl-5-phenyloxazolidin-2-thione (non-Evans *syn*-adduct 19) and (2'S, 3'S, 4R, 5S)-(+)-3-(7'-Benzyloxy-3'-hydroxy-2'-methylheptanoyl)-4-methyl-5-phenyloxazolidin-2-thione (*anti*-adduct 20)**

To a solution of oxazolidinethione **15**<sup>iii</sup> (120 mg, 0.48 mmol) in dry CH<sub>2</sub>Cl<sub>2</sub> (2 mL) at 0 °C was slowly added neat TiCl<sub>4</sub> (0.053 mL, 0.48 mmol). The orange mixture was stirred at 0 °C for 5 min followed by the addition of (–)-sparteine (0.28 mL, 1.2 mmol) to form a dark red enolate. The red mixture was stirred at 0 °C for 20 min then cooled to –78 °C. 5-Benzyloxypentanal<sup>ii</sup> (110 mg, 0.57 mmol) in dry CH<sub>2</sub>Cl<sub>2</sub> (2 mL) was added slowly and the mixture was stirred at –78 °C for 1 h and then at 0 °C for 1 hr. The reaction was quenched with 50% aqueous NH<sub>4</sub>Cl (5 mL) and warmed to room temperature. The layers were separated and the aqueous layer was extracted with CH<sub>2</sub>Cl<sub>2</sub> (3 × 10 mL). The organic layers were combined, washed with brine (2 × 20 mL) and dried over MgSO<sub>4</sub>. The solvent was evaporated to give the crude mixture which was purified by flash chromatography using hexane-ethyl acetate (4:1) to afford the Evans *syn*-isomer **18** (96 mg, 46%) as yellow oil together with the non-Evans *syn*-isomer **19** (43 mg, 20%) and *anti*-isomer **20** (20 mg, 10%);

**18**: [ $\alpha$ ]<sub>D</sub> +35.6° (c=0.82, CHCl<sub>3</sub>); Found: MH<sup>+</sup>, 442.2062, C<sub>25</sub>H<sub>32</sub>NO<sub>4</sub>S requires 442.2052;  $\nu_{\max}$  (cm<sup>-1</sup>) 3435br (OH), 1692s (C=O), 1377s;  $\delta_{\text{H}}$  (300 MHz, CDCl<sub>3</sub>) 0.94 (3H, d, *J* 6.6 Hz, Me), 1.23 (3H, d, *J* 7.0 Hz, Me), 1.45-1.71 (6H, m, H-4', H-5' and H-6'), 2.79 (1H, d, *J* 2.4 Hz, OH), 3.49 (2H, t, *J* 6.2 Hz, H-7'), 4.09 (1H, m, H-3'), 4.51 (2H, s, CH<sub>2</sub>Ph), 4.81 (1H, dq, *J* 2.6, 7.0 Hz, H-3'), 5.00 (1H, pentet, *J* 6.6 Hz, H-4), 5.75 (1H, d, *J* 7.2 Hz, H-5), 7.25-7.43 (10H, m, 2 × Ph);  $\delta_{\text{C}}$  (75 MHz, CDCl<sub>3</sub>) 10.4 (CH<sub>3</sub>, Me), 14.2 (CH<sub>3</sub>, Me), 22.6 (CH<sub>2</sub>, C-5'), 29.6 (CH<sub>2</sub>, C-4'), 33.5 (CH<sub>2</sub>, C-6'), 41.9 (CH, C-2'), 59.1 (CH, C-4), 70.2 (CH<sub>2</sub>, C-7'), 71.2 (CH, C-3'), 72.9 (CH<sub>2</sub>, CH<sub>2</sub>Ph), 83.0 (CH, C-5), 125.8 (CH, Ph), 127.5 (CH, Ph), 127.6 (CH, Ph), 128.3 (CH, Ph), 128.7 (CH, Ph), 129.0 (CH, Ph), 132.2 (C, Ph), 138.5 (C, Ph), 178.2 (C, C-1'), 184.9 (C, C-2); *m/z* (CI) 442 (MH<sup>+</sup>, 1%), 250 (36%), 194 (45%), 91 (CH<sub>2</sub>Ph, 43%), 85 (SCNCO, 100%).

**19**: [ $\alpha$ ]<sub>D</sub> +53.6° (c=1.2, CHCl<sub>3</sub>); Found: MH<sup>+</sup>, 442.2043, C<sub>25</sub>H<sub>32</sub>NO<sub>4</sub>S requires 442.2052;  $\nu_{\max}$  (cm<sup>-1</sup>) 3432br (OH), 1698s (C=O), 1375s;  $\delta_{\text{H}}$  (300 MHz, CDCl<sub>3</sub>) 0.92 (3H, d, *J* 6.6 Hz, Me), 1.26 (3H, d, *J* 6.9 Hz, Me), 1.44-1.68 (6H, m, H-4', H-5' and H-6'), 2.91 (1H, d, *J* 21 Hz, OH), 3.50 (2H, t, *J* 6.2 Hz, H-7'), 4.05 (1H, m, H-3'), 4.51 (2H, s, CH<sub>2</sub>Ph), 4.68 (1H, dq, *J* 2.8, 6.9 Hz, H-2'), 5.00 (1H, pentet, *J* 6.6 Hz, H-4), 5.75 (1H, d, *J* 7.2 Hz, H-5), 7.25-7.43 (10H, m, 2 × Ph);  $\delta_{\text{C}}$  (75 MHz, CDCl<sub>3</sub>) 10.1 (CH<sub>3</sub>, Me), 14.0 (CH<sub>3</sub>, Me), 22.7 (CH<sub>2</sub>, C-5'), 29.6 (CH<sub>2</sub>, C-4'), 33.8 (CH<sub>2</sub>, C-6'), 42.1 (CH, C-2'), 59.0 (CH, C-4), 70.2 (CH<sub>2</sub>, C-7'), 71.4 (CH, C-3'), 72.9 (CH<sub>2</sub>, CH<sub>2</sub>Ph), 83.1 (CH, C-5), 125.8 (CH, Ph), 127.5 (CH, Ph), 127.6 (CH, Ph), 128.3 (CH, Ph), 128.7 (CH, Ph), 129.0 (CH, Ph), 132.3 (C, Ph), 138.6 (C, Ph), 178.3 (C, C-2'), 184.8 (C, C-2); *m/z* (CI) 442 (MH<sup>+</sup>, 1.5%), 427 (MH-CH<sub>3</sub>, 2%), 250 (38%), 194 (100%), 178 (87%), 91 (CH<sub>2</sub>Ph, 84%), 84 (SCNCO, 99%).

**20**: [ $\alpha$ ]<sub>D</sub> +1.86° (c=1.05, CHCl<sub>3</sub>); Found: MH<sup>+</sup>, 442.2045, C<sub>25</sub>H<sub>32</sub>NO<sub>4</sub>S requires 442.2052;  $\nu_{\max}$  (cm<sup>-1</sup>) 3436br (OH), 1680s (C=O);  $\delta_{\text{H}}$  (300 MHz, CDCl<sub>3</sub>) 0.95 (3H, d, *J* 6.6 Hz, Me), 1.15 (3H,

d,  $J$  6.9 Hz, Me), 1.22-1.70 (6H, m, H-4', H-5' and H-6'), 2.85 (1H, d,  $J$  9.3 Hz, OH), 3.49 (2H, t,  $J$  6.1 Hz, H-7'), 3.74 (1H, q,  $J$  7.6 Hz, H-3'), 4.51 (2H, s,  $CH_2Ph$ ), 4.89 (1H, pentet,  $J$  6.9 Hz, H-2'), 5.02 (1H, pentet,  $J$  6.6 Hz, H-4), 5.75 (1H, d,  $J$  7.1 Hz, H-5), 7.25-7.44 (10H, m,  $2 \times Ph$ );  $\delta_C$  (75 MHz,  $CDCl_3$ ) 14.1 ( $CH_3$ , Me), 14.9 ( $CH_3$ , Me), 22.2 ( $CH_2$ , C-5'), 29.6 ( $CH_2$ , C-4'), 34.6 ( $CH_2$ , C-6'), 43.1 (CH, C-2'), 59.3 (CH, C-4), 70.2 ( $CH_2$ , C-7'), 72.9 (CH, C-3'), 72.9 ( $CH_2$ ,  $CH_2Ph$ ) 83.2 (CH, C-5), 125.8 (CH, Ph), 127.6 (CH, Ph), 127.7 (CH, Ph), 128.3 (CH, Ph), 128.7 (CH, Ph), 129.0 (CH, Ph), 132.1 (C, Ph), 138.5 (C, Ph), 177.5 (C, C-1'), 185.6 (C, C-2);  $m/z$  (CI) 442 ( $MH^+$ , 0.2%), 194 (63%), 91( $CH_2Ph$ , 100%), 85 (SCNCO, 99%).

### **(2S, 3S)-(+)-7-Benzyloxy-2-methylheptane-1,3-diol 21**

To a solution of *syn*-adduct **17** (310 mg, 0.73 mmol) in dry THF (4 mL) at 0 °C was added  $LiBH_4$  (23 mg, 1.1 mmol) and the reaction mixture was stirred at room temperature for 5 min. Water (2 mL) was added and the mixture concentrated under reduced pressure. The residue was extracted with ethyl acetate ( $3 \times 5$  mL), dried over  $MgSO_4$  and the solvent evaporated under reduced pressure. The crude product was purified by flash chromatography using hexane-ethyl acetate (3:2) as eluent to afford the *title compound* **21** (160 mg, 87%) as a yellow oil;  $[\alpha]_D +11.5^\circ$  ( $c=0.8$ ,  $CHCl_3$ ); Found:  $MH^+$ , 253.1804,  $C_{15}H_{26}O_3$  requires 253.1803;  $\nu_{max}$  (film)/ $cm^{-1}$  3390 (br, OH);  $\delta_H$  (300 MHz,  $CDCl_3$ ) 0.89 (3H, d,  $J$  7.1 Hz, Me), 1.26 (1H, m, H-2), 1.41-1.67 (6H, m, H-4, H-5, H-6), 2.50 (2H, br, OH), 3.49 (2H, t,  $J$  6.3 Hz, H-7), 3.68 (2H, d,  $J$  5.4 Hz, H-1), 3.81 (1H, m, H-3), 4.50 (2H, s,  $CH_2Ph$ ), 7.26-7.39 (5H, m, Ph);  $\delta_C$  (75 MHz,  $CDCl_3$ ) 10.1 ( $CH_3$ , Me), 22.9 ( $CH_2$ , C-5), 29.6 ( $CH_2$ , C-4), 33.7 ( $CH_2$ , C-6), 39.1 (CH, C-2), 67.1 ( $CH_2$ , C-1), 70.3 ( $CH_2$ , C-7), 72.9 ( $CH_2$ ,  $CH_2Ph$ ), 74.3 (CH, C-3), 127.5 (CH, *p*-Ph), 127.6 (CH, Ph), 128.3 (CH, Ph), 138.5 (C, Ph);  $m/z$  (CI) 253 ( $MH^+$ , 72%), 235 ( $MH-H_2O$ , 37%), 217 ( $MH-H_2O-H_2O$ , 28%), 145 (M-O $CH_2Ph$ , 27%), 91 ( $CH_2Ph$ , 100%).

### **(2S, 3S)-(-)-7-Benzyloxy-1-*tert*-butyldiphenylsilyloxy-2-methylheptan-3-ol 22**

To a solution of *tert*-butyldiphenylsilyl chloride (0.20 mL, 0.77 mmol) and imidazole (81 mg, 1.2 mmol) in dry dichloromethane (5 mL) at 0 °C was added a solution of diol **21** (150 mg, 0.60 mmol) in dry dichloromethane (5 mL). The reaction mixture was stirred at room temperature overnight. The mixture was diluted with dichloromethane (20 mL), washed with saturated solution of  $NaHCO_3$  ( $1 \times 5$  mL), brine ( $2 \times 5$  mL) and dried over  $MgSO_4$ . The solvent was

evaporated under reduced pressure to give the crude product which was purified by flash chromatography using hexane-ethyl acetate (9:1) as eluent to afford the *title compound 22* (220 mg, 77%) as a colourless oil;  $[\alpha]_D -3.0^\circ$  ( $c=0.73$ ,  $\text{CHCl}_3$ ); Found:  $\text{MH}^+$ , 491.2982,  $\text{C}_{31}\text{H}_{43}\text{O}_3\text{Si}$  requires 491.3007;  $\nu_{\text{max}}$  (film)/ $\text{cm}^{-1}$  3479br (OH), 1265s (Si-O-C);  $\delta_{\text{H}}$  (300 MHz,  $\text{CDCl}_3$ ) 0.89 (3H, d,  $J$  7.1 Hz, Me), 1.06 (9H, s,  $^t\text{Bu}$ ), 1.25-1.66 (7H, m, H-2, H-4, H-5, H-6), 2.74 (1H, br, OH), 3.49 (2H, t,  $J$  6.4 Hz, H-7), 3.67 (1H, dd,  $J$  5.9, 10.0 Hz, H-1A), 3.75 (1H, dd,  $J$  4.3, 10.0 Hz, H-1B), 3.86 (1H, m, H-3), 4.50 (2H, s,  $\text{CH}_2\text{Ph}$ ), 7.25-7.44 (11H, m, Ph), 7.64-7.69 (4H, m, Ph);  $\delta_{\text{C}}$  (75 MHz,  $\text{CDCl}_3$ ) 10.2 ( $\text{CH}_3$ , Me), 19.2 (C,  $^t\text{Bu}$ ), 22.9 ( $\text{CH}_2$ , C-5), 26.9 ( $\text{CH}_3$ ,  $^t\text{Bu}$ ), 29.8 ( $\text{CH}_2$ , C-4), 34.0 ( $\text{CH}_2$ , C-6), 39.1 (CH, C-2), 68.7 ( $\text{CH}_2$ , C-1), 70.4 ( $\text{CH}_2$ , C-7), 72.9 ( $\text{CH}_2$ ,  $\text{CH}_2\text{Ph}$ ), 74.1 (CH, C-3), 127.5 (CH, p-Ph), 127.6 (CH, Ph), 127.8 (CH, Ph), 128.3 (CH, Ph), 129.78 (CH, p-Ph), 129.82 (CH, p-Ph), 133.0 (C, Ph), 133.1 (C, Ph), 135.6 (CH, Ph), 135.7 (CH, Ph), 138.7 (C, Ph);  $m/z$  (CI) 491 ( $\text{MH}^+$ , 23%), 196 (100%), 91 ( $\text{CH}_2\text{Ph}$ , 81%).

**(2S, 3S)-(+)-7-Benzyloxy-1-tert-butyldiphenylsilyloxy-3-tert-butyldimethylsilyloxy-2-methylheptane 23**

To a mixture of 2,6-lutidine (0.09 mL, 0.8 mmol), 4-(dimethylamino)pyridine (49 mg, 0.4 mmol) and *tert*-butyldimethylsilyl trifluoromethanesulfonate (0.12 mL, 0.5 mmol) in dry DMF (5 mL) at 0 °C was added a solution of alcohol **22** (217 mg, 0.4 mmol) in dry DMF (10 mL). The mixture was stirred at room temperature overnight then the solvent was evaporated under reduced pressure. The residue was diluted with  $\text{Et}_2\text{O}$  (20 mL), washed with brine ( $2 \times 10$  mL), water ( $2 \times 10$  mL) and dried over  $\text{Na}_2\text{SO}_4$ . Removal of the solvent by evaporation under reduced pressure yielded the crude product that was purified by flash chromatography using hexane-ethyl acetate (95:5) as eluent to afford the *title compound 23* (230 mg, 95%) as a colourless oil;  $[\alpha]_D +1.8^\circ$  ( $c = 1.025$ ,  $\text{CHCl}_3$ ); Found:  $\text{MH}^+$ , 605.3846,  $\text{C}_{37}\text{H}_{57}\text{O}_3\text{Si}_2$  requires 605.3846;  $\nu_{\text{max}}$  ( $\text{cm}^{-1}$ ) 1252s (Si-O-C);  $\delta_{\text{H}}$  (300 MHz,  $\text{CDCl}_3$ )  $-0.02$  (3H, s,  $\text{Me}_2^t\text{BuSi}$ ), 0.01 (3H, s,  $\text{Me}_2^t\text{BuSi}$ ), 0.81 (3H, d,  $J$  7.1 Hz, Me), 0.84 (9H, s,  $\text{Me}_2^t\text{BuSi}$ ), 1.05 (9H, s,  $^t\text{BuPh}_2\text{Si}$ ), 1.25-1.41 (6H, m, H-4, H-5, H-6), 1.58 (1H, m, H-2), 3.45 (2H, t,  $J$  6.5 Hz, H-7), 3.48 (1H, dd,  $J$  6.7, 9.8 Hz, H-1A), 3.61 (1H, dd,  $J$  6.7, 9.8 Hz, H-1B), 3.81 (1H, dt,  $J$  3.0, 6.2 Hz, H-3), 4.49 (2H, s,  $\text{CH}_2\text{Ph}$ ), 7.2-7.4 (11H, m, Ph), 7.6-7.7 (4H, m, Ph);  $\delta_{\text{C}}$  (75 MHz,  $\text{CDCl}_3$ )  $-4.6$  ( $\text{CH}_3$ ,  $\text{Me}_2^t\text{BuSi}$ ),  $-4.1$  ( $\text{CH}_3$ ,  $\text{Me}_2^t\text{BuSi}$ ), 10.6 ( $\text{CH}_3$ , Me), 18.1 (C,  $^t\text{BuMe}_2\text{Si}$ ), 19.3 (C,  $^t\text{BuPh}_2\text{Si}$ ), 22.4 ( $\text{CH}_2$ , C-5), 25.9 ( $\text{CH}_3$ ,  $^t\text{BuMe}_2\text{Si}$ ), 26.9 ( $\text{CH}_3$ ,  $^t\text{BuPh}_2\text{Si}$ ), 29.9 ( $\text{CH}_2$ , C-4), 34.4 ( $\text{CH}_2$ , C-6), 39.9 (CH, C-2), 66.3 ( $\text{CH}_2$ , C-1), 70.4 ( $\text{CH}_2$ , C-7), 72.0 (CH, C-3), 72.9 ( $\text{CH}_2$ ,  $\text{CH}_2\text{Ph}$ ), 127.6

(CH, Ph), 128.3 (CH, p-Ph), 129.5 (CH, p-Ph), 134.08 (CH, Ph), 134.1 (C, Ph), 135.6 (CH, Ph), 138.7 (C, Ph);  $m/z$  (CI) 605 ( $MH^+$ , 18%), 547 ( $M-tBu$ , 4%), 217 (100%), 91 ( $CH_2Ph$ , 56%).

**(5*S*, 6*S*)-(+)-5-*tert*-Butyldimethylsilyloxy-1-*tert*-butyldiphenylsilyloxy-6-methylheptan-1-ol  
24**

A mixture of (2*S*, 3*S*)-(+)-7-benzyloxy-1-*tert*-butyldiphenylsilyloxy-3-*tert*-butyldimethylsilyloxy-2-methylheptane **23** (0.441 g, 0.73 mmol) and 10% palladium on carbon (catalytic amount) in methanol (10 mL) was stirred under a hydrogen atmosphere overnight. The mixture was filtered through Celite<sup>®</sup> and the solvent evaporated under reduced pressure. The crude product was purified by flash chromatography using hexane-ethyl acetate (95:5) as eluent to give the *title compound* **24** (0.37 g, 99%) as a colourless oil;  $[\alpha]_D +3.1^\circ$  ( $c=0.88$ ,  $CHCl_3$ ); Found:  $MH^+$ , 515.3383,  $C_{30}H_{51}O_3Si_2$  requires 515.3377;  $\nu_{max}$  ( $cm^{-1}$ ) 3369br (OH), 1252s (Si-O-C);  $\delta_H$  (300 MHz,  $CDCl_3$ ) -0.02 (3H, s,  $Me_2^tBuSi$ ), 0.02 (3H, s,  $Me_2^tBuSi$ ), 0.84 (12H, s,  $Me_2^tBuSi$  and Me), 1.05 (9H, s,  $^tBuPh_2Si$ ), 1.04-1.60 (6H, m, H-2, H-3, H-4), 1.74 (1H, m, H-6), 3.47 (1H, dd,  $J$  6.7, 9.8 Hz, H-7A), 3.59-3.64 (2H, m, H-7B, H-1), 3.81 (1H, td,  $J$  6.2, 3.2 Hz, H-5), 7.33-7.42 (6H, m, Ph), 7.63-7.68 (4H, m, Ph);  $\delta_C$  (75MHz,  $CDCl_3$ ) -4.6 ( $CH_3$ ,  $Me_2^tBuSi$ ), -4.1 ( $CH_3$ ,  $Me_2^tBuSi$ ), 10.7 ( $CH_3$ , Me), 18.1 (C,  $^tBuMe_2Si$ ), 19.3 (C,  $^tBuPh_2Si$ ), 25.9 ( $CH_3$ ,  $^tBuMe_2Si$ ), 26.9 ( $CH_3$ ,  $^tBuPh_2Si$ ), 29.7 ( $CH_2$ , C-4), 32.9 ( $CH_2$ , C-3), 34.3 ( $CH_2$ , C-2), 29.9 (CH, C-6), 63.0 ( $CH_2$ , C-1), 66.2 ( $CH_2$ , C-7), 72.0 (CH, C-5), 127.6 (CH, Ph), 129.5 (CH, Ph), 134.07 (C, Ph), 135.6 (CH, Ph);  $m/z$  (CI) 515 ( $MH^+$ , 1%), 325 (65%), 109 (100%).

**(5*S*, 6*S*)-(+)-5-*tert*-Butyldimethylsilyloxy-1-*tert*-butyldiphenylsilyloxy-6-methylheptan-1-ol  
12**

A mixture of alcohol **24** (0.643 g, 1.25 mmol), pyridinium chlorochromate (0.40 g, 1.87 mmol) and potassium carbonate (0.5 g) in dry dichloromethane (20 mL) was stirred at room temperature. After 3 h, the mixture was filtered through a pad of Celite<sup>®</sup> and silica gel. The solvent was evaporated under reduced pressure. The crude product was purified by flash chromatography using hexane-ethyl acetate (95:5) as eluent to afford the *title compound* **12** (0.63 g, 99%) as a colourless oil,  $[\alpha]_D +1.7^\circ$  ( $c = 1.39$ ,  $CHCl_3$ ); Found:  $MH^+$ , 513.3230,  $C_{30}H_{49}O_3Si_2$  requires 513.3230;  $\nu_{max}$  ( $cm^{-1}$ ) 1727s (C=O), 1252s (Si-O-C);  $\delta_H$  (300 MHz,  $CDCl_3$ ) -0.01 (3H, s,  $Me_2^tBuSi$ ), 0.02 (3H, s,  $Me_2^tBuSi$ ), 0.81 (3H, s, Me), 0.84 (9H, s,

$\text{Me}_2^t\text{BuSi}$ ), 1.05 (9H, s,  $^t\text{BuPh}_2\text{Si}$ ), 1.35-1.60 (4H, m, H-3, H-4), 1.74 (1H, m, H-6), 2.38 (2H, td,  $J$  7.2, 1.7 Hz, H-2), 3.47 (1H, dd,  $J$  6.6, 9.9 Hz, H-7A), 3.62 (1H, dd,  $J$  6.6, 9.9 Hz, H-7B), 3.81 (1H, td,  $J$  3.4, 5.9 Hz, H-5), 7.33-7.44 (6H, m, Ph), 7.62-7.67 (4H, m, Ph), 9.73 (1H, t,  $J$  1.7 Hz, H-1);  $\delta_{\text{C}}$  (75 MHz,  $\text{CDCl}_3$ ) -4.6 ( $\text{CH}_3$ ,  $\text{Me}_2^t\text{BuSi}$ ), -4.2 ( $\text{CH}_3$ ,  $\text{Me}_2^t\text{BuSi}$ ), 10.9 ( $\text{CH}_3$ , Me), 18.1 (C,  $\text{Me}_2^t\text{BuSi}$ ), 18.4 ( $\text{CH}_2$ , C-3), 19.2 (C,  $^t\text{BuPh}_2\text{Si}$ ), 25.9 ( $\text{CH}_3$ ,  $^t\text{BuMe}_2\text{Si}$ ), 26.9 ( $\text{CH}_3$ ,  $^t\text{BuPh}_2\text{Si}$ ), 34.0 ( $\text{CH}_2$ , C-4), 40.0 (CH, C-6), 43.9 ( $\text{CH}_2$ , C-2), 66.0 ( $\text{CH}_2$ , C-7), 71.9 (CH, C-5), 127.58 (CH, Ph), 127.60 (CH, Ph), 129.52 (CH, Ph), 129.54 (CH, Ph), 134.0 (C, Ph), 135.6 (CH, Ph), 202.4 (CH, C-1);  $m/z$  513 ( $\text{MH}^+$ , 27%), 455 ( $\text{M}^t\text{Bu}$ , 54%), 381 ( $\text{M}^t\text{BuMe}_2\text{SiO}$ , 100).

### (S)-(-)-[4-Benzyloxy-3-(*tert*-butyldimethylsilyloxy)butane]-1-sulfonylbenzene **13**

To a solution of methyl phenyl sulfone (0.22 g, 1.39 mmol) in dry THF (6 mL) at  $-78$  °C was added BuLi (0.96 mL, 1.6 M solution in hexane, 1.53 mmol) and the light brown solution was stirred at  $-78$  °C for 10 min then at room temperature for 30 min. Hexamethylphosphoramide (0.53 mL, 3.06 mmol) and a solution of epoxide **25**<sup>iv</sup> (0.2 g, 1.22 mmol) in dry THF (2 mL) were added at room temperature. The resultant clear bright yellow solution was stirred for 1.5 hr, then cooled to 0 °C. A premixed solution of *tert*-butyldimethylsilyl trifluoromethanesulfonate (0.35 mL, 1.53 mmol) and 2,6-lutidine (0.24 mL, 2.09 mmol) in dry THF (2 mL, 2  $\times$  1 mL wash) was added to the reaction mixture via cannula. A white precipitate formed that disappeared after 15 min. The mixture was stirred at 0 °C for 2.5 h then quenched with saturated  $\text{NH}_4\text{Cl}$  solution (3 mL). The organic phase was separated and the aqueous layer was extracted with  $\text{Et}_2\text{O}$  (3  $\times$  10 mL). The combined organic layers were washed with brine (2  $\times$  20 mL) and dried over  $\text{MgSO}_4$ . The solvent was evaporated under reduced pressure and the crude mixture was purified by flash chromatography using hexane-ethyl acetate (95:5) as eluent to afford the title compound **13** (0.58 g, 97%) as a yellow oil;  $[\alpha]_{\text{D}}$   $-14.2^\circ$  ( $c=1.6$ ,  $\text{CHCl}_3$ ); Found:  $\text{M}^+$ , 434.1943,  $\text{C}_{22}\text{H}_{34}\text{O}_4\text{SSi}$  requires 434.1947;  $\nu_{\text{max}}$  ( $\text{cm}^{-1}$ ) 1447m, 1307s ( $\text{SO}_2\text{Ph}$ ), 1255s (Si-O-C), 1146s ( $\text{SO}_2\text{Ph}$ );  $\delta_{\text{H}}$  (400 MHz,  $\text{CDCl}_3$ ) -0.012 (3H, s,  $\text{Me}_2^t\text{BuSi}$ ), 0.02 (3H, s,  $\text{Me}_2^t\text{BuSi}$ ), 0.82 (9H, s,  $^t\text{Bu}$ ), 1.84-1.96 (2H, m, H-2), 3.17 (2H, m, H-1), 3.23 (1H, dd,  $J$  6.6, 9.5 Hz, H-4A), 3.36 (1H, dd,  $J$  5.2, 9.5 Hz, H-4B), 3.91 (1H, m, H-3), 4.43 and 4.48 (2H, AB,  $J_{\text{AB}}$  11.9 Hz,  $\text{CH}_2\text{Ph}$ ), 7.23-7.35 (5H, m,  $\text{CH}_2\text{Ph}$ ), 7.55 (2H, m,  $\text{SO}_2\text{Ph}$ ), 7.63 (1H, m,  $\text{SO}_2\text{Ph}$ ), 7.89 (2H, m,  $\text{SO}_2\text{Ph}$ );  $\delta_{\text{C}}$  (75 MHz,  $\text{CDCl}_3$ ) -4.99 ( $\text{CH}_3$ ,  $\text{Me}_2^t\text{BuSi}$ ), -4.6 ( $\text{CH}_3$ ,  $\text{Me}_2^t\text{BuSi}$ ), 18.0 (C,  $\text{Me}_2^t\text{BuSi}$ ), 25.7 ( $\text{CH}_3$ ,  $\text{Me}_2^t\text{BuSi}$ ), 27.8 ( $\text{CH}_2$ , C-2), 52.1 ( $\text{CH}_2$ , C-1), 69.1 (CH, C-3), 73.31 ( $\text{CH}_2$ , C-4 or  $\text{CH}_2\text{Ph}$ ), 73.38 ( $\text{CH}_2$ ,  $\text{CH}_2\text{Ph}$  or C-4), 127.6 (CH, Ph), 127.7 (CH, Ph), 128.1 (CH,

Ph), 128.4 (CH, Ph), 129.2 (CH, Ph), 133.6 (CH, Ph), 137.9 (C, Ph), 139.0 (C, Ph);  $m/z$  434 ( $M^+$ , 0.3%), 171 (10%), 143 (18%), 91 ( $CH_2Ph$ , 100%).

## References

---

- i D. A. Evans, J. Bartroli and T. L. Shih, *J. Am. Chem. Soc.*, 1981, **103**, 2127.
- ii L. Börjesson, I. Csöregyh and C. J. Welch, *J. Org. Chem.*, 1995, **60**, 2989.
- iii Y. Nagao, T. Kumagai, S. Yamada and E. Fujita, *J. Chem. Soc. Perkin Trans. 1*, 1985, 2361.
- iv M. Lai, E. Oh, Y. Shih and H. Liu, *J. Org. Chem.*, 1992, **57**, 2417.
